# Supplementary material
Source: PubMed Central journal article supplement (PMC4433464)
Supplement: supp_WNL.0000000000001540_Appendix_e-1.pdf [file supp_WNL.0000000000001540_Appendix_e-1.pdf]

## Appendix e-1 - Brain Death Survey

Questions are listed in order of appearance

1. Please enter your email address (free text):
2. Please enter your country (free text):
3. Please enter the name of your institution (free text):
4. What is your role at the institution?
  - Neuro-intensivist
  - Intensive care doctor (but not a neurologist)
  - Neurologist (but not an intensive care doctor)
  - Neurosurgeon
  - Anesthesiologist
  - Physician (but none of the above specialties listed)
  - Non-physician healthcare worker
  - Administrator in hospital, government, or related worker in healthcare
5. Is the concept of "brain death" established in your country?
  - Yes
  - No
  - Don't know
6. Do you believe that brain death equates to cardiopulmonary death?
  - Yes
  - No
  - Uncertain
7. Has anyone been declared brain dead in your hospital?
  - Yes
  - No
  - Uncertain

***If 'Yes' is selected, then skip to question 10***

8. If no person has been declared brain dead in your hospital, why not? (please check all that apply)
  - No patients have been eligible for brain death declaration to date
  - No intensive care unit or advanced technology for critically ill patients
  - No physician expertise in brain death declaration
  - Withdrawal of support occurs before patients are eligible for brain death declaration
  - This concept is not established in our county
  - Other (please specify in next question)

***If any option but 'other' is selected, then skip to question 10***

9. You have selected 'Other' to the question: "If no person has been declared brain dead in your hospital, why not?". Please write why in the box provided below (free text):

10. Is there a legal provision for the declaration of brain death in your country?

- Yes, there is one law for the entire country
- Yes, but the law is different in various regions of the country
- No
- Uncertain

11. Is there a formal established protocol for the declaration of brain death in your hospital?

- Yes
- No
- Uncertain

***If 'Yes' is not selected, then skip to question 40***

12. What do you believe is the most common underlying cause of neurologic injury leading to brain death in your country?

- Ischemic stroke
- Hemorrhagic stroke
- Traumatic brain injury
- Cardiac arrest
- Infections of the central nervous system
- Uncertain

13. What specific parameters must be tested on clinical examination of patients for brain death declaration (please check all that apply)?

- absence of purposeful response to voice or tactile stimuli
- pupils in mid-position or dilated (4mm to 9mm) at rest
- absence of pupillary constriction to light
- absence of oculoccephalic reflex (or "cephalo-ocular" reflex)
- absence of oculovestibular reflex (or "vestibulo-ocular" reflex)
- absence of corneal reflex
- absence of facial grimacing to noxious stimuli
- absence of gag reflex
- absence of cough reflex
- absence of spinal reflexes (deep tendon reflexes, Babinski's sign, lower extremity triple flexion)
- Uncertain

14. Is an apnea test required for the declaration of brain death?

- Yes
- Not mandatory, but may be used as an optional additional test
- No, not mentioned in legal requirements or hospital protocol

***If 'No, not mentioned in legal requirements or hospital protocol' is selected, then skip to question 25***

15. What is the minimum duration of apnea testing?

- less than 5 minutes
- 5 to 7 minutes
- 8 to 10 minutes
- 11 to 13 minutes
- more than 13 minutes
- There is no minimum duration defined
- Uncertain

16. Is an arterial line required for apnea testing?

- Yes
- No or not defined in protocol
- Uncertain

17. Are there specific blood gas requirement thresholds that are required to declare a person brain dead?

- Yes
- No
- Uncertain

***If 'Yes' is not selected, then skip to question 21***

18. Absence of respiratory effort at an absolute minimum ending PaCO<sub>2</sub> (assuming patient does not retain CO<sub>2</sub> at baseline)?

- 41-50 mmHg
- 51-60 mmHg
- 61-70 mmHg
- >70 mmHg
- not defined

19. pH?

- <7.24
- 7.25-7.29
- 7.30-7.34
- not defined

20. Increase in PaCO<sub>2</sub> from baseline?

- 6-10 mmHg

- 11-15 mmHg
- 16-20 mmHg
- 21-25 mmHg
- >25 mmHg
- not defined

21. If apnea test cannot be performed due to clinical condition of the patient, are other tests (such as EEG, neuroimaging, or brain perfusion testing) required?

- Yes
- No
- Not defined
- Uncertain

22. How many times is the apnea test required to be performed?

- 1
- 2
- 3
- >3
- Uncertain

23. Is there a modified apnea test protocol for patients with high levels of Fractional inspired content of oxygen (FiO<sub>2</sub>) and/or Positive End Expiratory Pressure (PEEP)?

- Yes
- No
- Uncertain

***If 'Yes' is not selected, then skip to question 25***

24. What is the level of Continuous Positive Airway Pressure (CPAP)/PEEP at which the modified apnea test is performed?

- <5 cmH<sub>2</sub>O
- 6-10 cmH<sub>2</sub>O
- 11-15 cmH<sub>2</sub>O
- >15 cmH<sub>2</sub>O
- patient's level of PEEP on the ventilator
- not defined
- Uncertain

25. What are the mandatory minimum qualifications of the healthcare providers who declare brain death at your hospital? (choose as many answers as appropriate)

- Attending physician/consultant in any medical or surgical field
- Attending physician/consultant in neurology or neurosurgery
- Attending physician/consultant in intensive care medicine

- Doctor in training in any medical or surgical field
- Doctor in training in neurology or neurosurgery
- Doctor in training in intensive care medicine
- Nurse
- Healthcare worker (non-physician, non-nurse)
- No qualifications are formally required
- Uncertain

26. How many physicians are required for the declaration of brain death?

- 0
- 1
- 2
- 3
- >3
- Uncertain

27. Are healthcare providers other than physicians necessary for brain death declaration?

- Yes
- No

***If 'No' is selected, then skip to question 30***

28. What type of other healthcare providers are necessary for the declaration of brain death?

- nurse
- respiratory therapist
- religious representative
- attorney or judge

29. How many healthcare providers (other than physicians) are needed to declare brain death?

- 0
- 1
- 2
- 3
- >3
- Uncertain

30. Is there a specific minimum time of observation required from neurologic deterioration until brain death declaration can proceed?

- Yes, in all patients
- Yes, only in patients after cardiac arrest
- No
- Uncertain

**If 'No' or 'Uncertain' is selected, then skip to question 32**

31. What is the minimum time of observation required from neurologic deterioration until brain death declaration can proceed?

- 0-5 hours
- 6-10 hours
- 11-15 hours
- 16-20 hours
- 21-25 hours
- >25 hours
- not defined

32. Are any confirmatory tests (other than blood gases) needed for declaration of brain death?

- Yes
- No

33. What confirmatory tests can or must be used?

|                             | Yes and required      | Yes but optional      | No                    |
|-----------------------------|-----------------------|-----------------------|-----------------------|
| Electroencephalogram (EEG)  | <input type="radio"/> | <input type="radio"/> | <input type="radio"/> |
| Brain Perfusion Scan        | <input type="radio"/> | <input type="radio"/> | <input type="radio"/> |
| Transcranial doppler (TCD)  | <input type="radio"/> | <input type="radio"/> | <input type="radio"/> |
| Catheter cerebral angiogram | <input type="radio"/> | <input type="radio"/> | <input type="radio"/> |
| CT angiogram of head        | <input type="radio"/> | <input type="radio"/> | <input type="radio"/> |
| MRI brain                   | <input type="radio"/> | <input type="radio"/> | <input type="radio"/> |

34. If the clinical breath death exam is consistent with brain death but ancillary test obtained returns an equivocal result, can the patient be declared brain dead?

- Yes
- No
- Uncertain

35. Are there specific requirements for exclusion of sedative medications or substances as the cause of apparent brain death?

- Yes
- No
- Uncertain

36. Are there specific requirements for exclusion of profound and potentially reversible metabolic derangements as the cause of apparent brain death?

- Yes
- No
- Uncertain

37. Are there different brain death criteria for children?

- Yes
- No

***If 'No' is selected, then skip to question 40***

38. In what ways do the pediatric brain death criteria differ from the adult brain death criteria? (please check all that apply)

- number of healthcare providers needed to declare brain death
- qualifications of healthcare providers needed to declare brain death
- minimum observation time before brain death can be declared
- number of clinical examinations that must be performed
- different confirmatory tests required for the declaration of brain death
- Other

***If any option but 'other' is selected, then skip to question 40***

39. You have selected 'Other' to the question: "In what ways do the pediatric brain death criteria differ from the adult brain death criteria?". Please write how they differ in the box provided

40. Does your country/region have an organized organ transplant network?

- Yes
- No

41. Is there a requirement to contact the local organ procurement organization prior to declaration of brain death?

- Yes
- No
- not applicable as no provision for brain death
