# Supplementary material
Source: PubMed Central journal article supplement (PMC4433464)
Supplement: supp_WNL.0000000000001540_Table_e-1.pdf [file supp_WNL.0000000000001540_Table_e-1.pdf]

Table e-1: Reported use of ancillary testing in the declaration of brain death by world region and country-level national income per capita

|                      | Electroencephalogram |           |           | Transcranial Doppler |           |           | Magnetic resonance imaging |           |           | Nuclear perfusion imaging |           |           | Catheter based angiography |           |           | Computed tomography angiogram |           |           |
|----------------------|----------------------|-----------|-----------|----------------------|-----------|-----------|----------------------------|-----------|-----------|---------------------------|-----------|-----------|----------------------------|-----------|-----------|-------------------------------|-----------|-----------|
|                      | Req                  | opt       | no        | req                  | opt       | no        | req                        | opt       | no        | req                       | opt       | no        | req                        | opt       | no        | req                           | opt       | no        |
| AFRO (n=3)           | 0 (0%)               | 2 (67%)   | 1 (33%)   | 0 (0%)               | 1 (33%)   | 2 (67%)   | 0 (0%)                     | 1 (33%)   | 2 (67%)   | 0 (0%)                    | 2 (67%)   | 1 (33%)   | 0 (0%)                     | 0 (0%)    | 3 (100%)  | 0 (0%)                        | 2 (67%)   | 1 (33%)   |
| EMRO (n=9)           | 5 (55%)              | 4 (45%)   | 0 (0%)    | 1 (10%)              | 4 (45%)   | 4 (45%)   | 0 (0%)                     | 1 (11%)   | 8 (89%)   | 1 (11%)                   | 5 (56%)   | 3 (33%)   | 0 (0%)                     | 3 (33%)   | 6 (67%)   | 0 (0%)                        | 2 (22%)   | 7 (78%)   |
| EURO (n=31)          | 8 (26%)              | 15 (48%)  | 8 (26%)   | 1 (3%)               | 23 (74%)  | 7 (23%)   | 0 (0%)                     | 11 (35%)  | 20 (65%)  | 1 (4%)                    | 15 (48%)  | 15 (48%)  | 2 (6%)                     | 18 (58%)  | 11 (36%)  | 2 (6%)                        | 16 (52%)  | 13 (42%)  |
| PAHO (n=17)          | 5 (30%)              | 9 (53%)   | 3 (17%)   | 2 (12%)              | 12 (70%)  | 3 (18%)   | 0 (0%)                     | 3 (18%)   | 14 (82%)  | 1 (6%)                    | 10 (59%)  | 6 (35%)   | 2 (12%)                    | 6 (35%)   | 9 (53%)   | 1 (6%)                        | 6 (35%)   | 10 (59%)  |
| SEARO (n=2)          | 0 (0%)               | 1 (50%)   | 1 (50%)   | 0 (0%)               | 1 (50%)   | 1 (50%)   | 0 (0%)                     | 1 (50%)   | 1 (50%)   | 0 (0%)                    | 0 (0%)    | 2 (100%)  | 0 (0%)                     | 0 (0%)    | 2 (100%)  | 0 (0%)                        | 0 (0%)    | 2 (100%)  |
| WPRO (n=6)           | 2 (33%)              | 2 (33%)   | 2 (33%)   | 0 (0%)               | 2 (33%)   | 4 (67%)   | 0 (0%)                     | 2 (33%)   | 4 (67%)   | 0 (0%)                    | 3 (50%)   | 3 (50%)   | 0 (0%)                     | 3 (50%)   | 3 (50%)   | 0 (0%)                        | 2 (33%)   | 4 (67%)   |
| <b>Total (n=68)</b>  | <b>20</b>            | <b>33</b> | <b>15</b> | <b>4</b>             | <b>43</b> | <b>21</b> | <b>0</b>                   | <b>19</b> | <b>49</b> | <b>3</b>                  | <b>35</b> | <b>30</b> | <b>4</b>                   | <b>30</b> | <b>34</b> | <b>3</b>                      | <b>27</b> | <b>38</b> |
|                      | Electroencephalogram |           |           | Transcranial Doppler |           |           | Magnetic resonance imaging |           |           | Nuclear perfusion imaging |           |           | Catheter based angiography |           |           | Computed tomography angiogram |           |           |
|                      | req                  | opt       | no        | req                  | opt       | no        | req                        | opt       | no        | req                       | opt       | no        | req                        | opt       | no        | req                           | opt       | no        |
| low (n=2)            | 0 (0%)               | 2 (100%)  | 0 (0%)    | 0 (0%)               | 1 (50%)   | 1 (50%)   | 0 (0%)                     | 1 (50%)   | 1 (50%)   | 0 (0%)                    | 2 (100%)  | 0 (0%)    | 0 (0%)                     | 1 (50%)   | 1 (50%)   | 0 (0%)                        | 1 (50%)   | 1 (50%)   |
| lower middle (n=8)   | 3 (38%)              | 3 (38%)   | 2 (24%)   | 1 (13%)              | 4 (50%)   | 3 (37%)   | 0 (0%)                     | 4 (50%)   | 4 (50%)   | 0 (0%)                    | 3 (38%)   | 5 (62%)   | 0 (0%)                     | 3 (38%)   | 5 (62%)   | 0 (0%)                        | 3 (38%)   | 5 (62%)   |
| higher middle (n=22) | 8 (36%)              | 12 (55%)  | 2 (9%)    | 2 (9%)               | 16 (73%)  | 4 (18%)   | 0 (0%)                     | 6 (28%)   | 16 (72%)  | 1 (4%)                    | 13 (60%)  | 8 (36%)   | 2 (9%)                     | 11 (50%)  | 9 (41%)   | 0 (0%)                        | 14 (64%)  | 8 (36%)   |
| high (n=36)          | 9 (25%)              | 16 (44%)  | 11 (31%)  | 1 (3%)               | 22 (61%)  | 13 (36%)  | 0 (0%)                     | 8 (22%)   | 28 (78%)  | 2 (6%)                    | 17 (47%)  | 17 (47%)  | 2 (6%)                     | 15 (42%)  | 19 (52%)  | 3 (8%)                        | 9 (25%)   | 24 (67%)  |
| <b>Total (n=68)</b>  | <b>20</b>            | <b>33</b> | <b>15</b> | <b>4</b>             | <b>43</b> | <b>21</b> | <b>0</b>                   | <b>19</b> | <b>49</b> | <b>3</b>                  | <b>35</b> | <b>30</b> | <b>4</b>                   | <b>30</b> | <b>34</b> | <b>3</b>                      | <b>27</b> | <b>38</b> |

**Legend:**

WHO regions: AFRO = African Region, EMRO = Eastern Mediterranean Region, EURO = European Region, PAHO = Pan American Health Organization, SEARO = South East Asian Region, WPRO = West Pacific Region

According to World Bank Classification, based on 2012 GNI (Gross National Income) per capita per year - 1 = low income (\$ 1035 or less), 2 = lower middle income (\$1,036 - \$4,085), 3 = upper middle income (\$4,086 - \$12,615), 4 = high income (\$12,616 or more)
